1           Comparing Genomic and Epigenomic  
2           Features across Species Using the  
3           WashU Comparative Epigenome  
4           Browser

5   Xiaoyu Zhuo<sup>1,2</sup>, Silas Hsu<sup>1,2</sup>, Deepak Purushotham<sup>1,2</sup>, Samuel Chen<sup>1,2</sup>, Daofeng Li<sup>1,2</sup>,  
6   Ting Wang<sup>1,2,3</sup>

7

8   **1** Washington University School of Medicine in St. Louis, Department of Genetics, Saint Louis,  
9   Missouri, USA

10   **2** The Edison Family Center for Genome Sciences and Systems Biology, Washington University  
11   School of Medicine, St Louis, MO, USA

12   **3** McDonell Genome Institute, Washington University School of Medicine, St Louis, MO, USA

13

14

## 15 Abstract

16 Genome browsers have become an intuitive and critical tool to visualize and analyze genomic  
17 features and data. Conventional genome browsers display data/annotations on a single  
18 reference genome/assembly; there are also genomic alignment viewer/browsers that help users  
19 visualize alignment, mismatch, and rearrangement between syntenic regions. However, there is  
20 a growing need for a comparative epigenome browser that can display genomic and epigenomic  
21 datasets across different species and enable users to compare them between syntenic regions.  
22 Here, we present the WashU Comparative Epigenome Browser  
23 (<http://comparativegateway.wustl.edu>). It allows users to load functional genomic  
24 datasets/annotations mapped to different genomes and display them over syntenic regions  
25 simultaneously. The browser also displays genetic differences between the genomes from  
26 single nucleotide variants (SNVs) to structural variants (SVs) to visualize the association  
27 between epigenomic differences and genetic differences. Instead of anchoring all datasets to  
28 the reference genome coordinates, it creates independent coordinates of different genome  
29 assemblies to faithfully present features and data mapped to different genomes. It uses a  
30 simple, intuitive genome-align track to illustrate the syntenic relationship between different  
31 species. It extends the widely used WashU Epigenome Browser infrastructure and can be  
32 expanded to support multiple species. This new browser function will greatly facilitate  
33 comparative genomic/epigenomic research, as well as support the recent growing needs to  
34 directly compare and benchmark the T2T CHM13 assembly and other human genome  
35 assemblies.

36

## 37 Introduction

38 To meet the need to visualize genomic sequences and features at different scales in the  
39 genomic era, scientists developed genome browser/viewers to help interpret genomes. The  
40 UCSC Genome Browser, equipped with comprehensive annotations and intuitive navigation,  
41 gained widespread popularity in the community (Kent et al. 2002; Lee et al. 2022). In addition to  
42 the UCSC Genome Browser, there are multiple other tools available to visualize genomes each  
43 with its own advantages and focuses (e.g., Ensembl (Fernández-Suárez and Schuster 2010;  
44 Cunningham et al. 2022), GBrowse (Stein et al. 2002), WashU Epigenome Browser (Li et al.  
45 2019, 2022; Zhou et al. 2011), IGV (Robinson et al. 2011, 2022), and JBrowse (Buels et al.  
46 2016; Diesh et al. 2022)).

47 With sharply decreasing sequencing cost, many more genomes of different species become  
48 available, and there is an increased effort around the world to systematically sequence a wide  
49 variety of organisms (Rhie et al. 2021; Feng et al. 2020; Teeling et al. 2018). The advancement  
50 in sequencing technology also promoted many functional genomic assays, which enabled  
51 functional annotation of genomic regions (ENCODE Project Consortium 2012; Roadmap  
52 Epigenomics Consortium et al. 2015; Dekker et al. 2017; Bujold et al. 2016). Based on whole  
53 genome alignment between species, orthologous regions can be directly compared, and  
54 insights on conservation and adaptation of genomic features can be drawn. Comparative  
55 genomics thus has become an important tool to decipher genomic code (Alföldi and Lindblad-  
56 Toh 2013). Comparative epigenomics, which compares the epigenomic features of orthologous  
57 regions of multiple species, is also gaining popularity (Xiao et al. 2012; Prescott et al. 2015;  
58 Zhou et al. 2017; Modzelewski et al. 2021).

59 Starting from Miropeats, various visualization tools have been developed to display regional  
60 orthologous relationship between species (Parsons 1995; Guy et al. 2010; Sullivan et al. 2011;  
61 Goel and Schneeberger 2022; Vollger 2022; dporubsky 2021). These tools provide a variety of

62 comparative features. The gEVAL Browser was designed for genome assembly quality  
63 evaluation and can be used to visualize and compare genome assemblies (Chow et al. 2016).  
64 Nguyen et al. developed comparative assembly hubs using UCSC Genome Browser's  
65 framework (Nguyen et al. 2014). It utilizes snake track to show multiple query assemblies  
66 aligned to a target assembly, and annotations mapped to query assemblies can also be  
67 displayed with an automatic "liftOver". JBrowse2 v1.6.4 also starts to support cross-species  
68 comparison in synteny views (Buels et al. 2016; Diesh et al. 2022). CEpBrowser was developed  
69 to compare epigenomic datasets between human, mouse, and pig based on the UCSC Genome  
70 Browser framework in a gene-centric manner (Cao and Zhong 2013). It organizes linear  
71 representation of different species in different windows parallelly. By displaying different species  
72 in different windows, CEpBrowser can be implemented relatively easily without breaking the  
73 continuity of each genome. However, it only marks syntenic regions using the same color  
74 scheme but does not connect syntenic regions from different species or display any genetic  
75 differences. In addition, only comparisons between human (hg19), mouse (mm9) and pig  
76 (susScr2) are supported. Despite being the first comparative epigenome browser, it has not  
77 been widely used by the scientific community.

78 The WashU Epigenome Browser was developed in 2010 to host and display massive  
79 epigenomics datasets (Zhou et al. 2011; Li et al. 2019, 2022). It hosts datasets generated from  
80 Roadmap Epigenomics Project (Roadmap Epigenomics Consortium et al. 2015), ENCyclopedia  
81 Of DNA Elements (ENCODE) (ENCODE Project Consortium 2012), International Human  
82 Epigenome Consortium (IHEC) (Bujold et al. 2016), The Cancer Genome Atlas (TCGA) (Hutter  
83 and Zenklusen 2018), Toxicant Exposures and Responses by Genomic and Epigenomic  
84 Regulators of Transcription (TaRGET) (Wang et al. 2018), and 4D Nucleome Project (4DN)  
85 (Dekker et al. 2017). We recently refactored the browser and vastly improved its performance  
86 (Li et al. 2019, 2022).

87 Build upon the WashU Epigenome Browser, we developed the WashU Comparative Epigenome  
88 Browser based on four principles: 1, each assembly uses its own coordinates to anchor  
89 annotation and datasets mapped to it; 2, orthologous relationship and genetic variations  
90 between assemblies are intuitively illustrated; 3, adaptable to display any whole genome  
91 alignment at different scales and resolution; 4, inherits all features of modern genome browsers  
92 to facilitate user experience. Here we present the WashU Comparative Epigenome Browser to  
93 address the needs to navigate multiple genomes at once and visualize comparative  
94 genomics/epigenomics data.

## 95 Results

### 96 The genome-align track connects syntenic regions of two genome 97 assemblies

98 The foundation that enables comparative genome browsing is the alignment between genome  
99 assemblies. We developed a new track type called “genome-align track” which contains  
100 genome-wide syntenic relationship between the reference (target) genome and the secondary  
101 (query) genome at base-pair resolution. The genome-align track file can be constructed from  
102 standard chained alignment AXT files (Schwartz et al. 2003) using customized tools we  
103 developed.

104 We created a comparative epigenome gateway to help organize and facilitate the selection and  
105 display of curated genome-align tracks (<http://comparativegateway.wustl.edu/>). Using this  
106 gateway, the users first select the reference assembly. When one reference genome is  
107 selected, all the available genome-align tracks will be populated as a list of secondary genomes  
108 (Fig. 1). Then the user can select one or more genome-align tracks anchored to the reference  
109 genome, save the selection, and open a new WashU Epigenome Browser window with all the

110 selected genome-align tracks. With genome-align tracks loaded, the user can then use the  
111 browser's web interface to load available annotations (Tracks -> Annotation Tracks), public data  
112 (Tracks -> Public Data Hubs), or user's own data (Tracks -> Remote/Local Tracks) on the  
113 browser mapped to either reference genome or any of the loaded secondary genomes (Fig. 1).

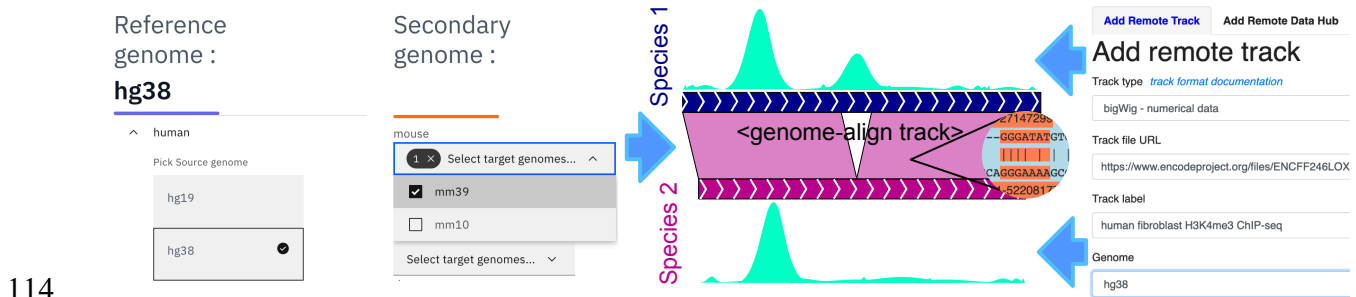

115 **Figure 1:**

116 The web user interface of the WashU Comparative Epigenome Browser. Genome-align track  
117 selector web interface is shown on the left. After selecting desired alignment tracks, the user will  
118 be redirected to the main WashU Epigenome Browser. At last, the user can load data and  
119 annotations to either reference or secondary genomes on the main browser site.

120

121 The genome-align track supports comprehensive, multi-resolution genome alignment display. At  
122 the finest resolution, orthologous coordinates from query genomes are vertically aligned and  
123 anchored to the reference genome. Detailed whole-genome alignment at the single nucleotide  
124 resolution is displayed in the genome-align track, enabling users to navigate and examine the  
125 genetic differences between the query genome and the reference genome. It is straightforward  
126 to visualize single-nucleotide variations (SNVs) and short insertion/deletions (indels) between  
127 the two genome assemblies (Fig. 2a).

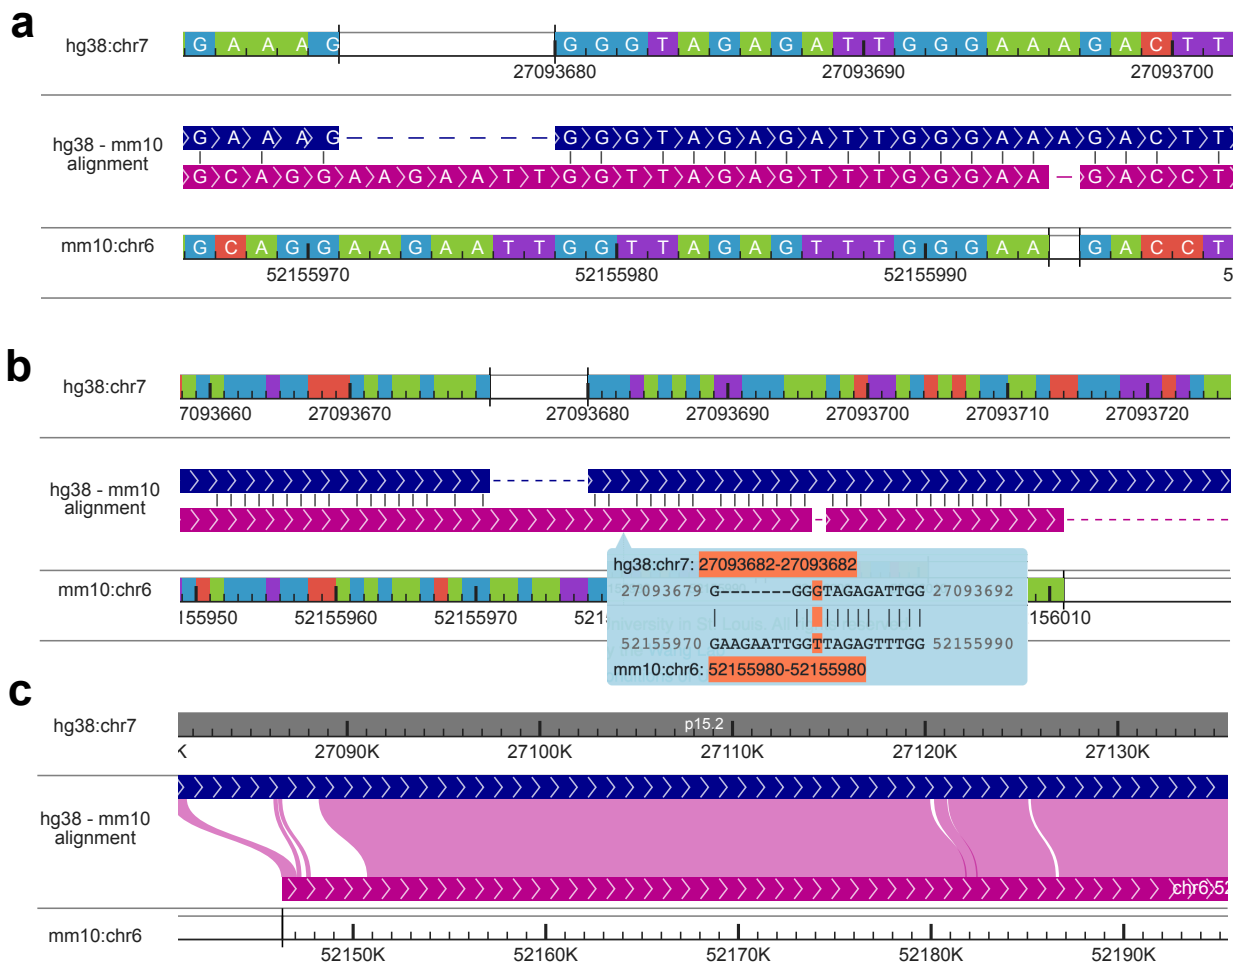

128

129 Figure 2:

130 Display genome alignment using the WashU Comparative Epigenome Browser. a: Displaying  
 131 hg38-mm10 blastz alignment at the nucleotide level with > 10 pixels per nucleotide. Sequence  
 132 strand in the alignment is illustrated using arrows. Syntenic nucleotides from hg38 and mm10  
 133 are vertically aligned with gaps inserted. Same nucleotides are illustrated by a short vertical line.  
 134 b: Displaying hg38-mm10 alignment between 0.1 pixels per nucleotide and 10 pixels per  
 135 nucleotide. The alignment is organized the same as panel A without displaying nucleotides  
 136 within the alignment. Alignments at nucleotide resolution are visible in the cursor tip hover box  
 137 and the nucleotide alignment under the cursor is highlighted in orange (G - T). c: Displaying  
 138 alignment with > 10 nucleotides per pixel. Both hg38 and mm10 genomes are continuously  
 139 displayed without gaps. Syntenic regions are connected using Bezier curves.

140

141 Users can pan and zoom on the genome-align track using the tools bar on top of the displayed  
142 window in a similar fashion as they operate on any other browser track types. When the number  
143 of nucleotides within a browser window exceeds the available pixels to display each nucleotide  
144 clearly (10 pixels per nucleotide), the browser stops displaying individual nucleotides within the  
145 alignment. Instead, it would display a 20-bp alignment in a floating box next to the cursor when  
146 the user mouses over the genome-align track (Fig. 2b). This feature helps users to visualize a  
147 larger aligned region without missing the base-pair resolution information in the alignment.  
148 Vertically aligning and anchoring query genomes to the reference genome is a straightforward  
149 and convenient way to display SNVs and small indels between query and reference genomes.  
150 However, it is insufficient to show any large, more complexed structural variations (SVs)  
151 between species. The WashU Comparative Epigenome Browser displays both the reference  
152 and query genomes in a linear manner and connect syntenic regions using Bezier curves if the  
153 browser window contains a long genomic alignment (more than 10 bases per pixel) (Fig. 2c). By  
154 doing so, large scale genetic variations can be directly visualized in the browser. Since both  
155 genomes are continuously and co-linearly displayed, epigenomic features are also displayed in  
156 full without sudden truncation.

157

## 158 Using the WashU Comparative Epigenome Browser to compare 159 epigenomic features between species

160 The genome-align track is more than just a visualization tool to display pairwise whole-genome  
161 alignments. After loading the genome-align track onto the browser, users can load annotations  
162 and datasets mapped to the secondary genome in the browser and compare them with those  
163 mapped to the reference genome. With this feature, the browser connects annotations and  
164 datasets from different genomes together using their syntenic relationship in the same window.



165 While users navigate the reference genome, the browser retrieves syntenic coordinates from  
166 other genomes and fetches all the loaded tracks.

167 We can use the browser to characterize deeply conserved epigenomic marks. In Fig. 3a the  
168 browser displays deeply conserved CpG methylation in liver between mouse and zebrafish  
169 using methylC tracks (Yue et al. 2014; Yang et al. 2020; Zhou et al. 2014). By displaying the  
170 Hox C gene cluster from both mouse and zebrafish reference genomes and their syntenic  
171 relationship, we can appreciate that only a small fraction of their genomic sequences can be  
172 aligned with each other after hundreds of million years of independent evolution, recapitulating  
173 the discovery made by Zhang et al. (Zhang et al. 2016). Even conserved CpG islands between  
174 these two species are sparse. However, except for a few species-specific transposable  
175 elements, the CpG sites are hypomethylated in the region in both species. Despite limited  
176 sequence conservation, the apparent epigenomic conservation suggests deeply conserved  
177 regulatory pattern in the region.

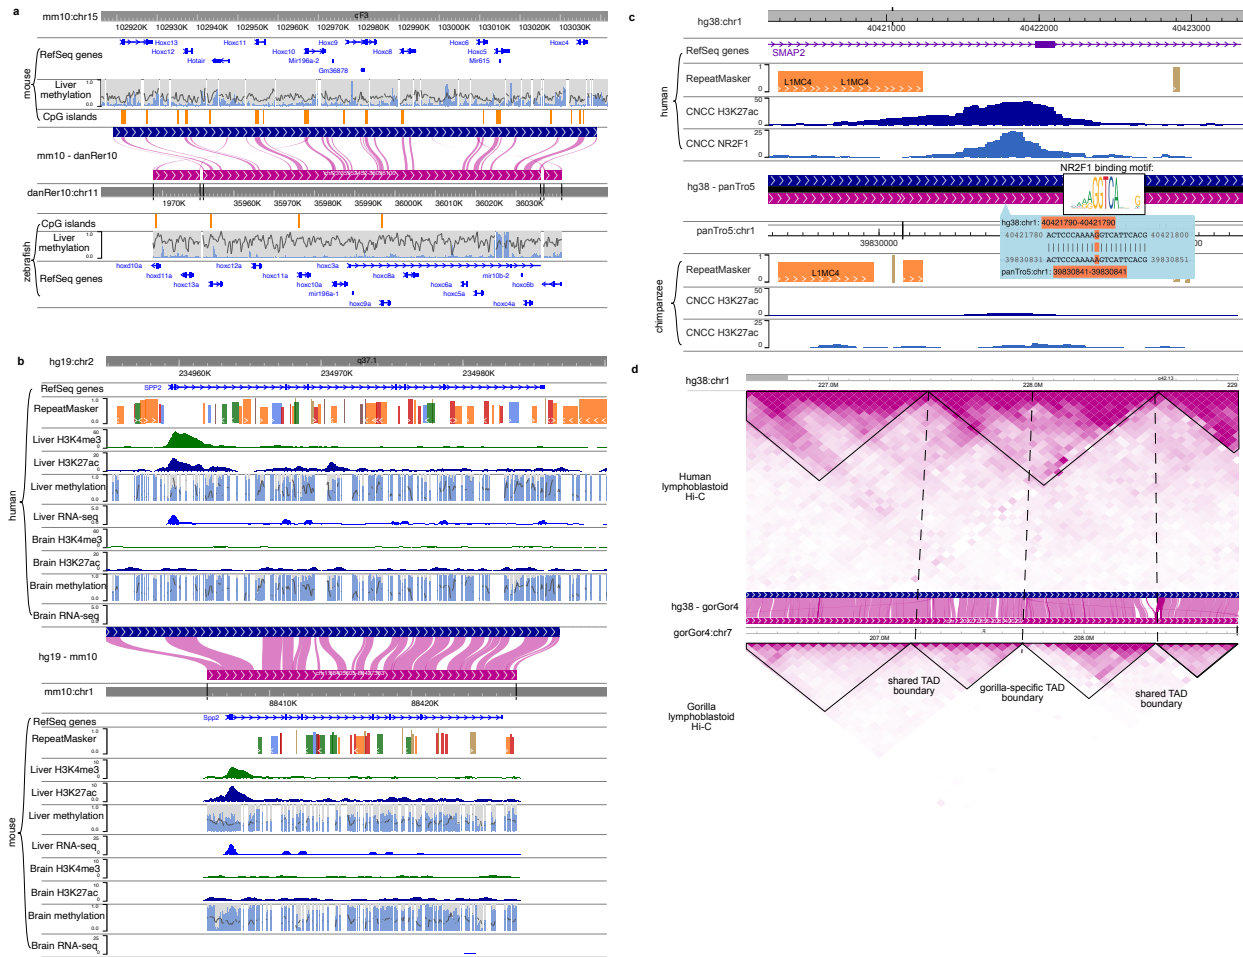

178

179 **Figure 3:**

180 Compare epigenomes between species. a: The DNA methylation status of Hox C gene cluster  
181 is conserved between mouse and zebrafish. Mouse and zebrafish DNA methylomes were  
182 characterized by Zhang et al. Mouse and zebrafish reference genome (mm10 and danRer7) are  
183 shown back-to-back anchored by the mouse-zebrafish genome-align track along with their  
184 gene, repeat, and CpG Island annotations. Liver DNA methylome data from Zhang et al. using  
185 Enhanced Reduced Representation Bisulfite Sequencing (ERRBS) (Zhang et al. 2016) is  
186 displayed. b: H3K4me3 and H3K27ac ChIP-seq, WGBS and RNA-seq of brain and liver  
187 samples from both human and mouse of SPP2/Spp2 gene are displayed using the WashU  
188 Comparative Epigenome Browser. Both DNA methylation level and read depth are illustrated in  
189 the MethyIC track. c: Lineage-specific epigenomic innovation. H3K27ac, NR2F1 ChIP-seq data  
190 from both human and chimpanzee CNCC in SMAP2 gene regions were plotted in the WashU  
191 Comparative Epigenome Browser. A human-specific NR2F1 and H3K27ac peak suggests a  
192 putative human-specific enhancer in this region. The putative enhancer is associated with a

193 human-specific NR2F1 binding motif. d: 3D genome structure differences between species.  
194 Human lymphoblastoid Hi-C contact map mapped to hg38 and gorilla lymphoblastoid Hi-C data  
195 mapped to gorGor4 were compared by anchoring to the human-gorilla alignment track.  
196  
197 Epigenomic modifications underlie tissue specificity. It has been shown before that the tissue-  
198 specific epigenomic patterns are often conserved between species (Zhou et al. 2017). The  
199 comparative browser makes it intuitive to examine the conservation pattern of tissue-specific  
200 gene activities. Fig. 3b illustrates the conserved liver-specific expression and epigenome  
201 landscape of gene Secreted Phosphoprotein 2 (SPP2) between human and mouse. Epigenomic  
202 data, including Whole-Genome Bisulfite Sequencing (WGBS), H3K4me3 ChIP-seq, H3K27ac  
203 ChIP-seq, and RNA-seq data of liver and brain from ENCODE and mouse ENCODE are  
204 displayed on the respective reference genomes in the comparative browser (ENCODE Project  
205 Consortium 2012; Yue et al. 2014) spanning the syntenic region around human SPP2 gene and  
206 its orthologous mouse Spp2 gene (Fig. 3b). Both species share the pattern of liver-specific  
207 active histone marks, low DNA methylation and high RNA expression, as well as lack of active  
208 histone/expression and high DNA methylation in the brain, indicating epigenetic conservation.  
209  
210 In addition to showcasing conserved features, the browser is equally effective at visualizing  
211 lineage-specific epigenomic features. Fig. 3c displays H3K27ac and transcription factor NR2F1  
212 ChIP-seq data from iPSC-derived Cranial Neural Crest Cells (CNCC) of both human and  
213 chimpanzee (Prescott et al. 2015). This region contains a putative human-specific enhancer,  
214 defined by the co-occurrence of NR2F1-binding and H3K27ac peak in the intron of SMAP2  
215 gene. The epigenomic signature suggests that this is either a human-gain or chimpanzee-loss  
216 of a putative CNCC enhancer. Zooming in to examine the alignment at base level, we identified  
217 a single nucleotide difference between human and chimpanzee that maps to a high information  
218 content position in the NR2F motif, potentially explaining the enhancer gain or loss. This

219 example demonstrates that our browser can be used to associate epigenomic differences  
220 between species with their genetic differences.

221  
222 The comparative browser also supports visualization and comparison of long-range chromatin  
223 interaction data across different genomes, thus facilitating the studies of 3D genome evolution  
224 (Vietri Rudan et al. 2015). Fig. 3d directly compares the 3D genome structure between human  
225 and gorilla in the human chr1 q42.13 region. Hi-C data from lymphoblastoid cells of human and  
226 gorilla reveals several conserved TADs. Interestingly, one TAD in human is split into two  
227 different TADs in the gorilla. This observation using the comparative browser recapitulated  
228 insights from Yang et al. (Yang et al. 2019).

229

## 230 Visualizing the relationship between genomic variation and 231 epigenomic variation

232 There has been a growing interest in understanding the relationship between genetic variation  
233 and epigenetic variation. We have already demonstrated using the browser to display the  
234 association between epigenomic changes with a SNP (Fig. 3c). Recently we characterized  
235 structural variations (SVs) between human and chimpanzee and their impact on the epigenome  
236 (Zhuo et al. 2020). Fig. 4a illustrates an interesting case of human-specific TE-derived putative  
237 enhancer. In this comparative browser view, investigators can easily and intuitively compare a  
238 species-specific TE insertion and its associated epigenomic modification. Here, a human-  
239 specific retrotransposon SVA\_F appears in the intron of the DNMBP gene. The sequence of this  
240 SVA\_F element is highly repetitive, thus it exhibits low mappability scores (average 50bp score  
241 <0.05) indicating that short sequencing reads derived from this element may not be uniquely  
242 mapped back (Derrien et al. 2012). Indeed, a cranial neural crest cell (CNCC) H3K27ac ChIP-

243 seq dataset (sequenced using 50 bp reads) does not contain signal within the SVA\_F element  
244 but reveals a peak at the 3' boundary of the element. Further analysis suggests that this  
245 boundary peak reflects enhancer signals from within this SVA\_F element (Zhuo et al. 2020). In  
246 contrast, an iPSC H3K9me3 ChIP-seq dataset (sequenced using 100 bp paired-end reads) is  
247 able to uniquely reveal an enrichment peak over this SVA\_F element, indicating the deployment  
248 of repressive chromatin onto this newly inserted retrotransposon in iPSC (Zhuo et al. 2020). The  
249 parallelly displayed chimpanzee genome and corresponding epigenomic datasets illustrate the  
250 lack of this specific SVA\_F insertion and absent of respective epigenomic marks. This direct  
251 visual comparison of the retrotransposon insertion and epigenomic changes between the two  
252 species recapitulates the discovery of a tissue-specific enhancer derived from a human-specific  
253 retrotransposon insertion.

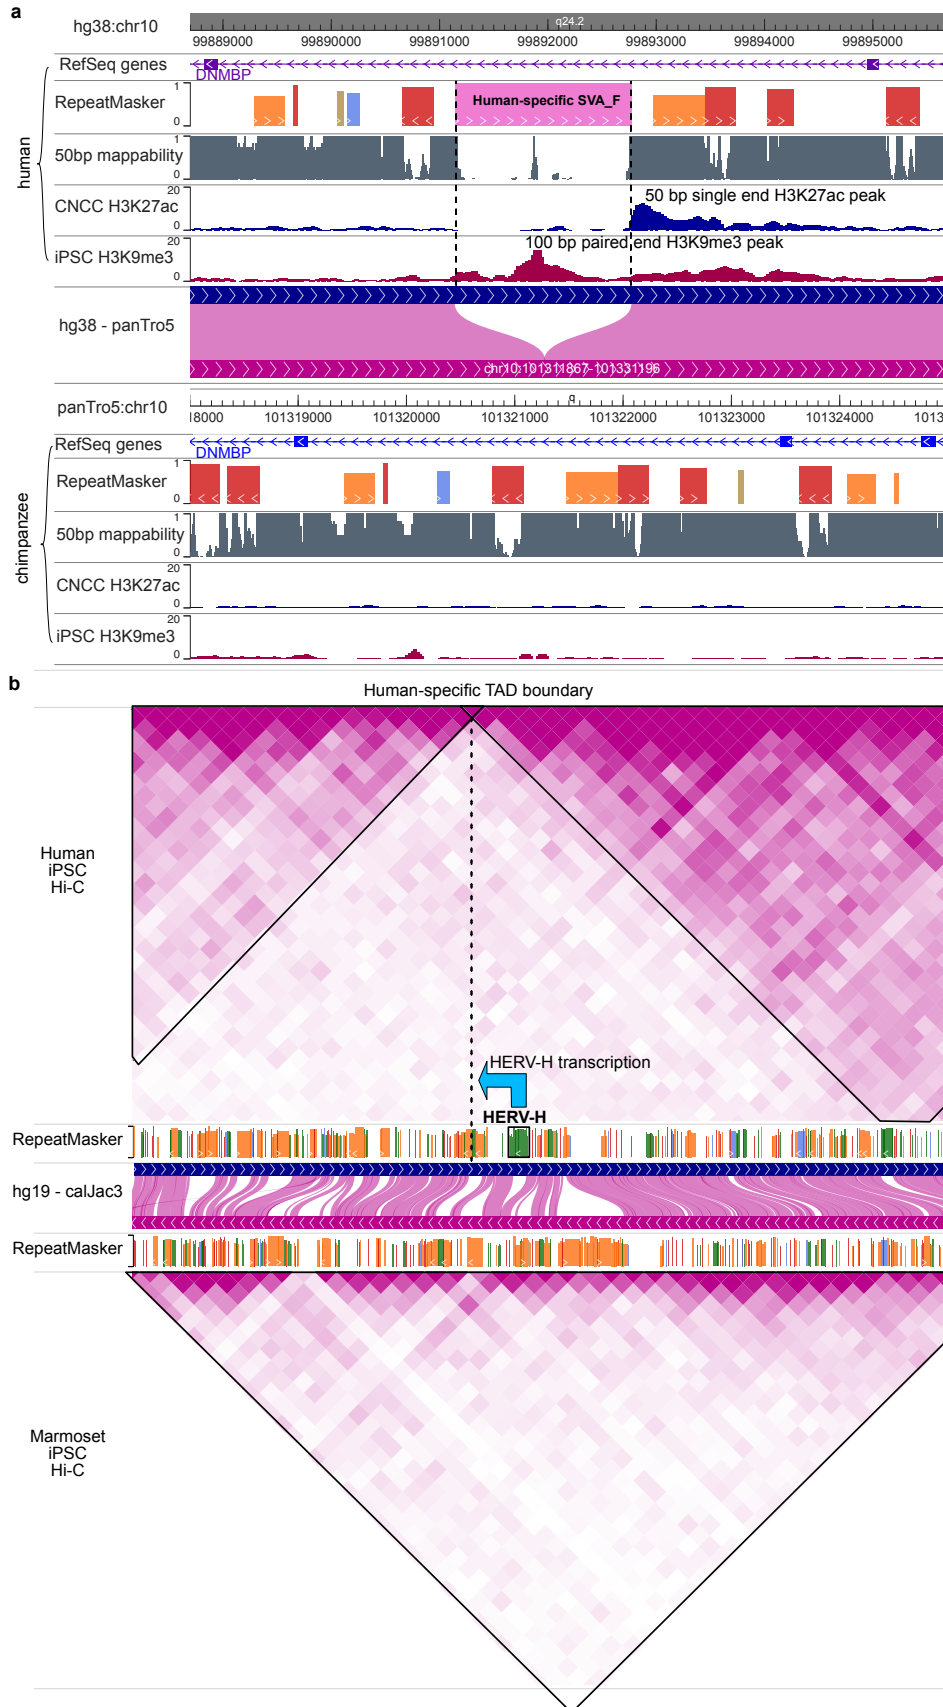

255 Figure 4:

256 Connecting epigenomic changes with genomic changes using the WashU Comparative  
257 Epigenome Browser. a: RefSeq Genes, repeatMasker and 50bp mappability annotations along  
258 with H3K27ac ChIP-seq data from Cranial neural crest cell (CNCC) and H3K9me3 ChIP-seq  
259 data from iPSC in both human and chimpanzee were plotted in DNMBP gene region. The  
260 H3K9me3 peak in the human-specific SVA insertion indicates epigenomic repression of this  
261 element in iPSC and the human-specific H3K27ac and NR2F1 peak indicates the creation of a  
262 putative new CNCC enhancer in the human-lineage. b: Human-specific HERV-H expression is  
263 correlated with a new TAD boundary in iPSC in the human genome compared with the  
264 marmoset genome.

265

266 Zhang et al. demonstrated that the expression of HERV-H is associated with new TAD  
267 boundaries in primates (Zhang et al. 2019). This association can be easily appreciated in a  
268 comparative browser view. In Fig. 4b Hi-C maps of human iPSC and marmoset iPSC can be  
269 directly compared in the context of their genome alignment. In the human genome, an HERV-H  
270 insertion is associated with a human-specific TAD boundary reflected by the Hi-C contact map,  
271 which is absent in the marmoset genome (Fig. 4b). It is notable that the TAD boundary is ~20kb  
272 downstream of the HERV-H insertion in the human genome, suggesting it is the expression  
273 instead of the presence of binding motif in the HERV-H that contributes to the TAD boundary.  
274 These examples demonstrate that the WashU Comparative Epigenome Browser can be used to  
275 directly compare genomic datasets across species and visualize the association with genetic  
276 changes.

277

## 278 Displaying genome annotations and datasets from multiple 279 species using the WashU Comparative Epigenome Browser

280 A natural extension of the pairwise comparison functions is to support comparison among  
281 multiple species. Conceptually, this extension is equivalent to visualizing genomic data aligned  
282 to a multiple genome alignment across species. Practically, we use multiple genome-align  
283 tracks to anchor the visualization to the same reference genome, thus enabling an intuitive  
284 comparison of genomic data across orthologous regions of multiple species.

285 We use CTCF turnover events characterized in Schmidt et. al. and Choudhary et. al. (Schmidt  
286 et al. 2012; Choudhary et al. 2020) to illustrate the comparative analysis across multiple  
287 genomes.

288 Schmidt et. al. characterized the CTCF binding sites of six mammalian species (human,  
289 macaque, mouse, rat, dog and opossum) and identified thousands of conserved as well as  
290 lineage-specific, retrotransposon-derived CTCF binding sites (Schmidt et al. 2012). We display  
291 both CTCF ChIP-seq data and called CTCF binding peaks of the six species from this study  
292 using the WashU Comparative Epigenome Browser, anchored on the human reference genome  
293 hg19. (Fig. 5). This allows direct comparison of CTCF binding across species along with genetic  
294 changes in each lineage.



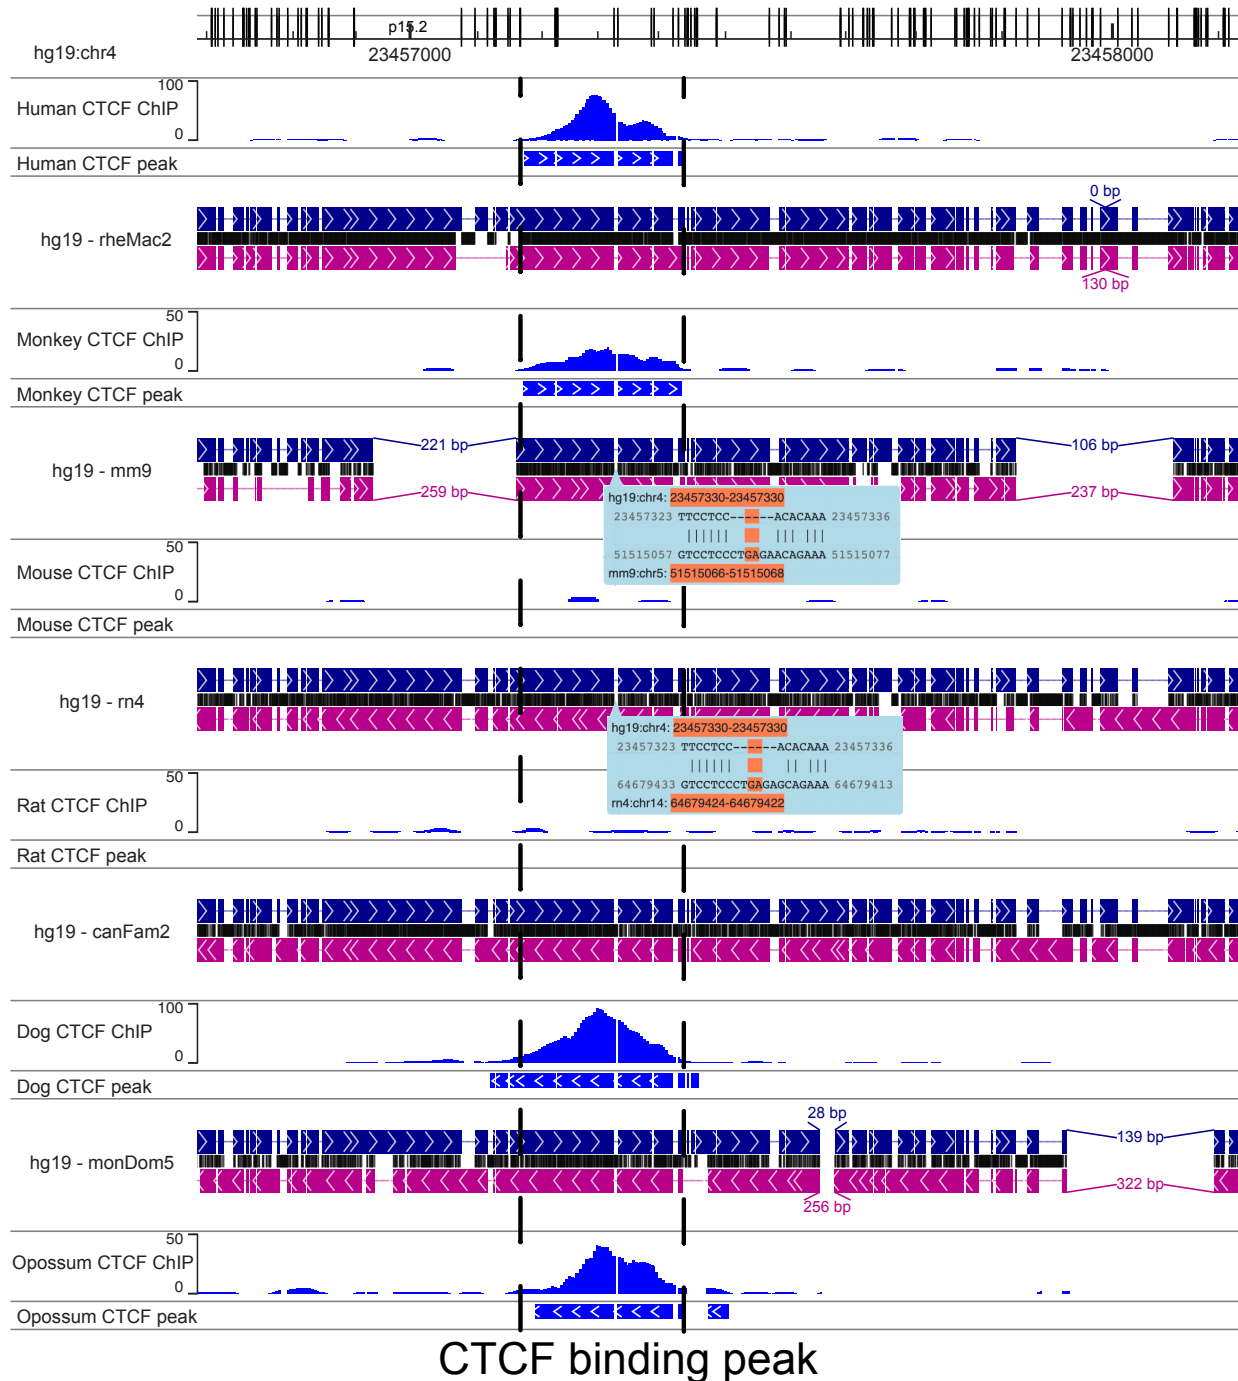

295

296

Figure 5:

297

Using the WashU Comparative Epigenome Browser to visualize and compare the CTCF binding

298

sites from six mammals. Genes, repeats, CTCF ChIP-seq and input from human (hg19), rhesus

299

macaque (rheMac2), mouse (mm9), rat (rn4), dog (canFam2) and opossum (monDom5) were

300

displayed on the browser. Human reference genome hg19 was used as the reference genome

301

and all the other species were anchored to their orthologous region from hg19 using whole

302 genome alignments. A: hg19: chr4:23456625-23458090 region shows a conserved CTCF  
303 binding peak in the orthologous loci in all mammal genomes except the two rodents, indicates a  
304 rodent-specific loss of a conserved CTCF binding site. The loss of CTCF binding is also  
305 coincided with a rodent-specific 6bp insertion.

306

307 Fig. 5 highlights the loss of a conserved CTCF binding sites in rodents (Fig. 5). All genome  
308 assemblies are vertically aligned, and interruptions are introduced in the tracks when gaps  
309 occur in either reference or secondary genomes. In contrast to the other four genomes, mouse  
310 and rat do not display a CTCF binding peak in this region, and this event is associated with a  
311 rodent-specific 6 bp insertion in the ortholog site of the CTCF site conserved in the other four  
312 species. Again, the WashU Comparative Epigenome Browser makes it intuitive to display and  
313 identify associations between genetic changes and epigenomic changes across multiple  
314 species.

315

## 316 Extending comparative genomic analysis to non-model organisms 317 and new assemblies

318 The WashU Comparative Epigenome Browser is built on an actively maintained and  
319 expandable platform. New genomes are routinely added to the browser to serve scientists  
320 around the world. The browser engineers respond to new comments and feature request  
321 (including request for new genomes) on the browser GitHub repository frequently  
322 (<https://github.com/lidaof/eg-react/issues>). We also documented how to add new genomes to  
323 the browser for a local environment for advanced users with JavaScript background  
324 (<https://epigenomegateway.readthedocs.io/en/latest/add.html>).

325 Using this flexible framework, we created multiple non-model organism reference genomes in  
326 our browser. For example, we created reference cattle genome UMD\_3.1.1/bosTau8, and

327 generated bosTau8-mm10 genome-align track using bosTau8 as the reference genome. Fig. 6a  
328 displays a direct comparison of DNA methylation patterns between cattle and mouse across  
329 heart, lung and liver (Liu et al. 2020; Zhou et al. 2020). We display the methylation pattern of  
330 liver-specific gene Spp2 promoter in the comparative browser, and we can see the tissue-  
331 specific methylation pattern is conserved between mouse and cow (Fig. 6a). Thus, the  
332 application of the WashU Comparative Epigenome Browser can easily extend beyond traditional  
333 model organisms.

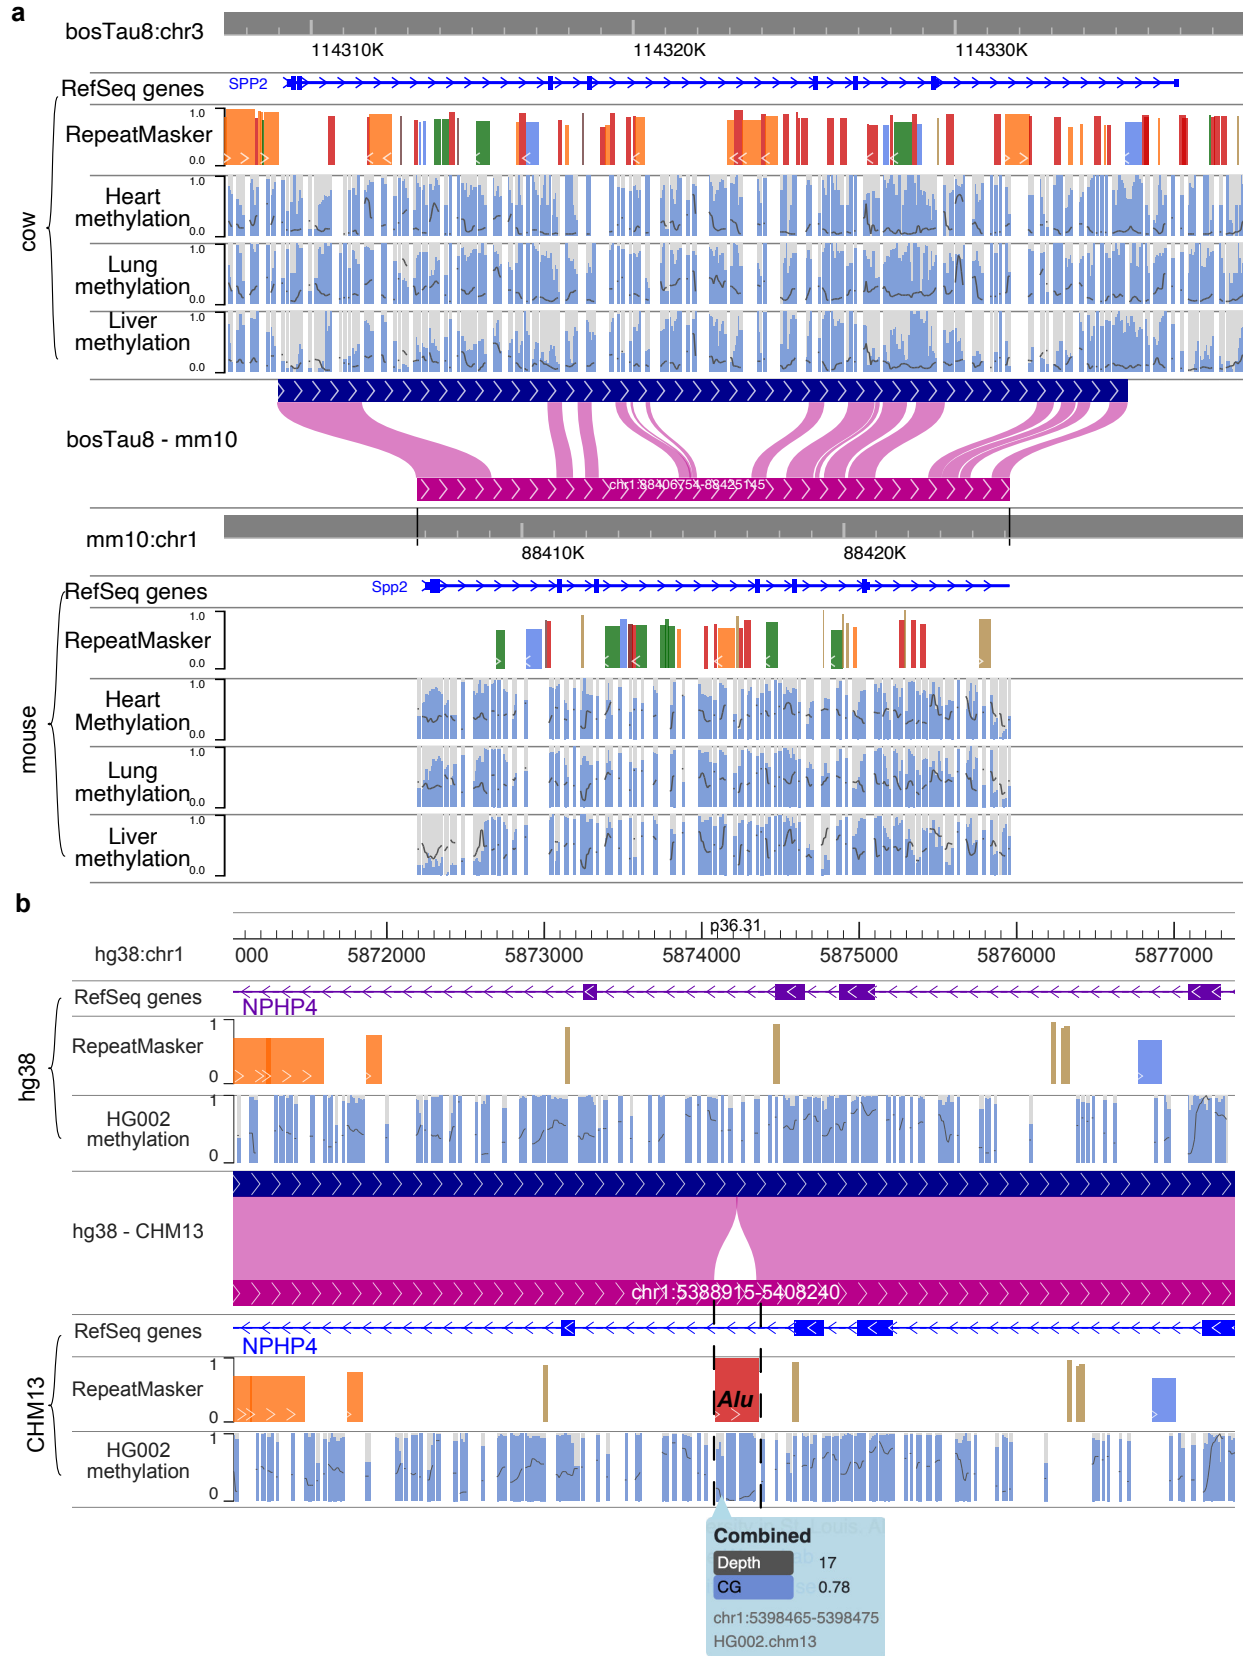

335 Figure 6:

336 a: Create a cattle-mouse comparative browser view and use it to compare DNA methylation in  
337 heart, lung and liver between cow and mouse. RefSeq genes, repeatMasker tracks along with  
338 DNA methylation status of heart, lung and liver tissues from both cow and mouse were plotted  
339 on the Comparative Epigenome Browser. b: Utilizing the browser to compare the difference  
340 between hg38 and CHM13 and how it may affect genomic analysis. The same HG002 WGBS  
341 data was mapped to hg38 and CHM13, respectively. The DNA methylation difference by either  
342 genome is minimum across most of the genomic region, but an *Alu* insertion is only presents in  
343 the CHM13 reference, and the hypermethylation of this *Alu* element can only be assessed using  
344 the CHM13 reference.

345

346 Finally, the comparative browser also fulfills a growing need in the field to compare and  
347 benchmark the performance of different human genome assemblies (Aganezov et al. 2022).  
348 The recent release of the T2T CHM13 genome assembly as well as multiple alternative human  
349 genome assemblies from the Human Pangenome Reference Consortium (Cheng et al. 2021;  
350 Ebert et al. 2021; Jarvis et al. 2022; Wang et al. 2022; Garg et al. 2021; Porubsky et al. 2021)  
351 represents a major improvement for genomics, but the impact of analyzing functional genomics  
352 data using different genome assemblies remains to be evaluated. Our Browser support direct  
353 visualization of such evaluations. We mapped the public HG002 WGBS data (Baid et al. 2020)  
354 to both hg38 and CHM13 reference genomes, and in Fig. 6b we illustrate an *Alu* insertion  
355 present in CHM13 but absent in hg38. In this case, the presence and hypermethylation of the  
356 *Alu* in HG002 is only visible when the reads were mapped to the CHM13 reference genome  
357 (Foon et al. 2021; Nurk et al. 2021). Therefore, the WashU Comparative Epigenome Browser  
358 provides a near-term, conventional visualization of differential mapping results before the  
359 maturation of pangenome graph mapping and subsequent visualization (Miga and Wang 2021;  
360 Wang et al. 2022; Liao et al. 2022; Hickey et al. 2022; Guarracino et al. 2021).

361

362

## 363 Discussion

364 Here we present the WashU Comparative Epigenome Browser to visualize comparative  
365 genomic/epigenomic features. The browser functions may help scientists interested in  
366 comparative genomics/epigenomics to examine their regions of interest and produce publication  
367 quality browser views to showcase their findings. In addition to a growing number of genomes,  
368 genome-align tracks, and genomics datasets we currently host, users can build and host their  
369 own comparative browser with customized species and genome builds. It enables scientists,  
370 especially those working on non-model organisms, to visualize and compare genomic and  
371 epigenomic features of different species.

372

373 The comparative features are fundamentally enabled by the genome-align track, a pairwise  
374 genomic alignment track derived from AXT format (Schwartz et al. 2003). Comparison across  
375 multiple genomes is achieved by using multiple genome-align tracks anchoring to the same  
376 reference genome. While it is possible to generalize the comparative functions based on a multi-  
377 genome alignment, the pairwise comparison is more technically practical and intuitive on a two-  
378 dimension computer screen. We envision continued exploration of advanced web technologies  
379 to further enhance the performance of multi-genome comparison.

## 380 Acknowledgement

381 We want to thank Jian Ma, Yang Yang from Carnegie Mellon University for providing the human  
382 and chimpanzee Hi-C dataset.

## 383 Reference

- 384 Aganezov S, Yan SM, Soto DC, Kirsche M, Zarate S, Avdeyev P, Taylor DJ, Shafin K, Shumate  
385 A, Xiao C, et al. 2022. A complete reference genome improves analysis of human  
386 genetic variation. *Science* **376**: eabl3533.
- 387 Alföldi J, Lindblad-Toh K. 2013. Comparative genomics as a tool to understand evolution and  
388 disease. *Genome Res* **23**: 1063–1068.
- 389 Baid G, Nattestad M, Kolesnikov A, Goel S, Yang H, Chang P-C, Carroll A. 2020. An Extensive  
390 Sequence Dataset of Gold-Standard Samples for Benchmarking and Development.  
391 2020.12.11.422022. <https://www.biorxiv.org/content/10.1101/2020.12.11.422022v1>  
392 (Accessed November 9, 2022).
- 393 Buels R, Yao E, Diesh CM, Hayes RD, Munoz-Torres M, Helt G, Goodstein DM, Elisk CG,  
394 Lewis SE, Stein L, et al. 2016. JBrowse: a dynamic web platform for genome  
395 visualization and analysis. *Genome Biology* **17**: 66.
- 396 Bujold D, Morais DA de L, Gauthier C, Côté C, Caron M, Kwan T, Chen KC, Laperle J,  
397 Markovits AN, Pastinen T, et al. 2016. The International Human Epigenome Consortium  
398 Data Portal. *cells* **3**: 496-499.e2.
- 399 Cao X, Zhong S. 2013. Enabling interspecies epigenomic comparison with CEpBrowser.  
400 *Bioinformatics* **29**: 1223–1225.
- 401 Cheng H, Concepcion GT, Feng X, Zhang H, Li H. 2021. Haplotype-resolved de novo assembly  
402 using phased assembly graphs with hifiasm. *Nature Methods* 1–6.
- 403 Choudhary MN, Friedman RZ, Wang JT, Jang HS, Zhuo X, Wang T. 2020. Co-opted  
404 transposons help perpetuate conserved higher-order chromosomal structures. *Genome*  
405 *Biology* **21**: 16.
- 406 Chow W, Brugger K, Caccamo M, Sealy I, Torrance J, Howe K. 2016. gEVAL - a web-based  
407 browser for evaluating genome assemblies. *Bioinformatics* **32**: 2508–2510.
- 408 Cunningham F, Allen JE, Allen J, Alvarez-Jarreta J, Amode MR, Armean IM, Austine-Orimoloye  
409 O, Azov AG, Barnes I, Bennett R, et al. 2022. Ensembl 2022. *Nucleic Acids Research*  
410 **50**: D988–D995.
- 411 Dekker J, Belmont AS, Guttman M, Leshyk VO, Lis JT, Lomvardas S, Mirny LA, O’Shea CC,  
412 Park PJ, Ren B, et al. 2017. The 4D nucleome project. *Nature* **549**: 219–226.
- 413 Derrien T, Estellé J, Marco Sola S, Knowles DG, Raineri E, Guigó R, Ribeca P. 2012. Fast  
414 computation and applications of genome mappability. *PLoS ONE* **7**: e30377.
- 415 Diesh C, Stevens GJ, Xie P, Martinez TDJ, Hershberg EA, Leung A, Guo E, Dider S, Zhang J,  
416 Bridge C, et al. 2022. JBrowse 2: A modular genome browser with views of synteny and  
417 structural variation. 2022.07.28.501447.

- 418 <https://www.biorxiv.org/content/10.1101/2022.07.28.501447v1> (Accessed November 8,  
419 2022).
- 420 dporubsky. 2021. daewoooo/SVbyEye. <https://github.com/daewoooo/SVbyEye> (Accessed  
421 October 14, 2022).
- 422 Ebert P, Audano PA, Zhu Q, Rodriguez-Martin B, Porubsky D, Bonder MJ, Sulovari A, Ebler J,  
423 Zhou W, Mari RS, et al. 2021. Haplotype-resolved diverse human genomes and  
424 integrated analysis of structural variation. *Science*.  
425 <https://science.sciencemag.org/content/early/2021/02/24/science.abf7117> (Accessed  
426 February 26, 2021).
- 427 ENCODE Project Consortium. 2012. An integrated encyclopedia of DNA elements in the human  
428 genome. *Nature* **489**: 57–74.
- 429 Feng S, Stiller J, Deng Y, Armstrong J, Fang Q, Reeve AH, Xie D, Chen G, Guo C, Faircloth  
430 BC, et al. 2020. Dense sampling of bird diversity increases power of comparative  
431 genomics. *Nature* **587**: 252–257.
- 432 Fernández-Suárez XM, Schuster MK. 2010. Using the Ensembl Genome Server to Browse  
433 Genomic Sequence Data. *Current Protocols in Bioinformatics* **30**: 1.15.1-1.15.48.
- 434 Foox J, Nordlund J, Lalancette C, Gong T, Lacey M, Lent S, Langhorst BW, Ponnaluri VKC,  
435 Williams L, Padmanabhan KR, et al. 2021. The SEQC2 epigenomics quality control  
436 (EpiQC) study. *Genome Biology* **22**: 332.
- 437 Garg S, Functammasan A, Carroll A, Chou M, Schmitt A, Zhou X, Mac S, Peluso P, Hatas E,  
438 Ghurye J, et al. 2021. Chromosome-scale, haplotype-resolved assembly of human  
439 genomes. *Nat Biotechnol* **39**: 309–312.
- 440 Goel M, Schneeberger K. 2022. plotsr: Visualising structural similarities and rearrangements  
441 between multiple genomes. 2022.01.24.477489.  
442 <https://www.biorxiv.org/content/10.1101/2022.01.24.477489v1> (Accessed January 29,  
443 2022).
- 444 Guarracino A, Heumos S, Nahnsen S, Prins P, Garrison E. 2021. *ODGI: understanding*  
445 *pangenome graphs*. Genomics <http://biorxiv.org/lookup/doi/10.1101/2021.11.10.467921>  
446 (Accessed November 12, 2021).
- 447 Guy L, Kultima JR, Andersson SGE. 2010. genoPlotR: comparative gene and genome  
448 visualization in R. *Bioinformatics* **26**: 2334–2335.
- 449 Hickey G, Monlong J, Novak A, Eizenga JM, Consortium HPR, Li H, Paten B. 2022.  
450 Pangenome Graph Construction from Genome Alignment with Minigraph-Cactus.  
451 2022.10.06.511217. <https://www.biorxiv.org/content/10.1101/2022.10.06.511217v1>  
452 (Accessed October 8, 2022).
- 453 Hutter C, Zenklusen JC. 2018. The Cancer Genome Atlas: Creating Lasting Value beyond Its  
454 Data. *Cell* **173**: 283–285.



- 455 Jarvis ED, Formenti G, Rhie A, Guarracino A, Yang C, Wood J, Tracey A, Thibaud-Nissen F,  
456 Vollger MR, Porubsky D, et al. 2022. Semi-automated assembly of high-quality diploid  
457 human reference genomes. *Nature* 1–13.
- 458 Kent WJ, Sugnet CW, Furey TS, Roskin KM, Pringle TH, Zahler AM, Haussler D. 2002. The  
459 Human Genome Browser at UCSC. *Genome Research* **12**: 996–1006.
- 460 Lee BT, Barber GP, Benet-Pagès A, Casper J, Clawson H, Diekhans M, Fischer C, Gonzalez  
461 JN, Hinrichs AS, Lee CM, et al. 2022. The UCSC Genome Browser database: 2022  
462 update. *Nucleic Acids Research* **50**: D1115–D1122.
- 463 Li D, Hsu S, Purushotham D, Sears RL, Wang T. 2019. WashU Epigenome Browser update  
464 2019. *Nucleic Acids Research* **47**: W158–W165.
- 465 Li D, Purushotham D, Harrison JK, Hsu S, Zhuo X, Fan C, Liu S, Xu V, Chen S, Xu J, et al.  
466 2022. WashU Epigenome Browser update 2022. *Nucleic Acids Research* gkac238.
- 467 Liao W-W, Asri M, Ebler J, Doerr D, Haukness M, Hickey G, Lu S, Lucas JK, Monlong J, Abel  
468 HJ, et al. 2022. A Draft Human Pangenome Reference. 2022.07.09.499321.  
469 <https://www.biorxiv.org/content/10.1101/2022.07.09.499321v1> (Accessed July 10, 2022).
- 470 Liu S, Yu Y, Zhang S, Cole JB, Tenesa A, Wang T, McDanel TG, Ma L, Liu GE, Fang L. 2020.  
471 Epigenomics and genotype-phenotype association analyses reveal conserved genetic  
472 architecture of complex traits in cattle and human. *BMC Biology* **18**: 80.
- 473 Miga KH, Wang T. 2021. The Need for a Human Pangenome Reference Sequence. *Annu Rev*  
474 *Genom Hum Genet*. [https://www.annualreviews.org/doi/10.1146/annurev-genom-](https://www.annualreviews.org/doi/10.1146/annurev-genom-120120-081921)  
475 [120120-081921](https://www.annualreviews.org/doi/10.1146/annurev-genom-120120-081921) (Accessed May 4, 2021).
- 476 Modzelewski AJ, Shao W, Chen J, Lee A, Qi X, Noon M, Tjokro K, Sales G, Biton A, Anand A,  
477 et al. 2021. A mouse-specific retrotransposon drives a conserved Cdk2ap1 isoform  
478 essential for development. *Cell* **0**. [https://www.cell.com/cell/abstract/S0092-](https://www.cell.com/cell/abstract/S0092-8674(21)01104-1)  
479 [8674\(21\)01104-1](https://www.cell.com/cell/abstract/S0092-8674(21)01104-1) (Accessed October 12, 2021).
- 480 Nguyen N, Hickey G, Raney BJ, Armstrong J, Clawson H, Zweig A, Karolchik D, Kent WJ,  
481 Haussler D, Paten B. 2014. Comparative assembly hubs: web-accessible browsers for  
482 comparative genomics. *Bioinformatics* **30**: 3293–3301.
- 483 Nurk S, Koren S, Rhie A, Rautiainen M, Bzikadze AV, Mikheenko A, Vollger MR, Altemose N,  
484 Uralsky L, Gershman A, et al. 2021. *The complete sequence of a human genome*.  
485 <https://www.biorxiv.org/content/10.1101/2021.05.26.445798v1> (Accessed October 5,  
486 2021).
- 487 Parsons JD. 1995. Miropeats: graphical DNA sequence comparisons. *Bioinformatics* **11**: 615–  
488 619.
- 489 Porubsky D, Ebert P, Audano PA, Vollger MR, Harvey WT, Marijon P, Ebler J, Munson KM,  
490 Sorensen M, Sulovari A, et al. 2021. Fully phased human genome assembly without  
491 parental data using single-cell strand sequencing and long reads. *Nat Biotechnol* **39**:  
492 302–308.

- 493 Prescott SL, Srinivasan R, Marchetto MC, Grishina I, Narvaiza I, Selleri L, Gage FH, Swigut T,  
494 Wysocka J. 2015. Enhancer Divergence and cis-Regulatory Evolution in the Human and  
495 Chimp Neural Crest. *CELL* **163**: 68–83.
- 496 Rhie A, McCarthy SA, Fedrigo O, Damas J, Formenti G, Koren S, Uliano-Silva M, Chow W,  
497 Fungtammasan A, Kim J, et al. 2021. Towards complete and error-free genome  
498 assemblies of all vertebrate species. *Nature* **592**: 737–746.
- 499 Roadmap Epigenomics Consortium, Kundaje A, Meuleman W, Ernst J, Bilenky M, Yen A,  
500 Heravi-Moussavi A, Kheradpour P, Zhang Z, Wang J, et al. 2015. Integrative analysis of  
501 111 reference human epigenomes. *518*: 317–330.
- 502 Robinson JT, Thorvaldsdóttir H, Turner D, Mesirov JP. 2022. igv.js: an embeddable JavaScript  
503 implementation of the Integrative Genomics Viewer (IGV). 2020.05.03.075499.  
504 <https://www.biorxiv.org/content/10.1101/2020.05.03.075499v2> (Accessed November 8,  
505 2022).
- 506 Robinson JT, Thorvaldsdóttir H, Winckler W, Guttman M, Lander ES, Getz G, Mesirov JP. 2011.  
507 Integrative genomics viewer. *Nature Biotechnology* **29**: 24–26.
- 508 Schmidt D, Schwalie PC, Wilson MD, Ballester B, Gonçalves Â, Kutter C, Brown GD, Marshall  
509 A, Flicek P, Odom DT. 2012. Waves of Retrotransposon Expansion Remodel Genome  
510 Organization and CTCF Binding in Multiple Mammalian Lineages. *CELL* **148**: 335–348.
- 511 Schwartz S, Kent WJ, Smit A, Zhang Z, Baertsch R, Hardison RC, Haussler D, Miller W. 2003.  
512 Human-mouse alignments with BLASTZ. **13**: 103–107.
- 513 Stein LD, Mungall C, Shu S, Caudy M, Mangone M, Day A, Nickerson E, Stajich JE, Harris TW,  
514 Arva A, et al. 2002. The Generic Genome Browser: A Building Block for a Model  
515 Organism System Database. *Genome Res* **12**: 1599–1610.
- 516 Sullivan MJ, Petty NK, Beatson SA. 2011. Easyfig: a genome comparison visualizer.  
517 *Bioinformatics* **27**: 1009–1010.
- 518 Teeling EC, Vernes SC, Dávalos LM, Ray DA, Gilbert MTP, Myers E, Bat1K Consortium. 2018.  
519 Bat Biology, Genomes, and the Bat1K Project: To Generate Chromosome-Level  
520 Genomes for All Living Bat Species. *Annual review of animal biosciences* **6**: 23–46.
- 521 Vietri Rudan M, Barrington C, Henderson S, Ernst C, Odom DT, Tanay A, Hadjur S. 2015.  
522 Comparative Hi-C Reveals that CTCF Underlies Evolution of Chromosomal Domain  
523 Architecture. *Cell Reports* **10**: 1297–1309.
- 524 Vollger MR. 2022. Saffire. <https://github.com/mrvollger/Saffire> (Accessed October 14, 2022).
- 525 Wang T, Antonacci-Fulton L, Howe K, Lawson HA, Lucas JK, Phillippy AM, Popejoy AB, Asri M,  
526 Carson C, Chaisson MJP, et al. 2022. The Human Pangenome Project: a global  
527 resource to map genomic diversity. *Nature* **604**: 437–446.
- 528 Wang T, Pehrsson EC, Purushotham D, Li D, Zhuo X, Zhang B, Lawson HA, Province MA,  
529 Krapp C, Lan Y, et al. 2018. The NIEHS TaRGET II Consortium and environmental  
530 epigenomics. *Nature Biotechnology* **36**: 225–227.

- 531 Xiao S, Xie D, Cao X, Yu P, Xing X, Chen C-C, Musselman M, Xie M, West FD, Lewin HA, et al.  
532 2012. Comparative epigenomic annotation of regulatory DNA. **149**: 1381–1392.
- 533 Yang H, Luan Y, Liu T, Lee HJ, Fang L, Wang Y, Wang X, Zhang B, Jin Q, Ang KC, et al. 2020.  
534 A map of cis-regulatory elements and 3D genome structures in zebrafish. *Nature* **588**:  
535 337–343.
- 536 Yang Y, Zhang Y, Ren B, Dixon JR, Ma J. 2019. Comparing 3D Genome Organization in  
537 Multiple Species Using Phylo-HMRF. *Cell Systems* **8**: 494-505.e14.
- 538 Yue F, Cheng Y, Breschi A, Vierstra J, Wu W, Ryba T, Sandstrom R, Ma Z, Davis C, Pope BD,  
539 et al. 2014. A comparative encyclopedia of DNA elements in the mouse genome. *Nature*  
540 **515**: 355–364.
- 541 Zhang C, Hoshida Y, Sadler KC. 2016. Comparative Epigenomic Profiling of the DNA  
542 Methylome in Mouse and Zebrafish Uncovers High Interspecies Divergence. *Front*  
543 *Genet* **7**. <http://journal.frontiersin.org/Article/10.3389/fgene.2016.00110/abstract>  
544 (Accessed January 15, 2021).
- 545 Zhang Y, Li T, Preissl S, Amaral ML, Grinstein JD, Farah EN, Destici E, Qiu Y, Hu R, Lee AY, et  
546 al. 2019. Transcriptionally active HERV-H retrotransposons demarcate topologically  
547 associating domains in human pluripotent stem cells. **164**: 1110.
- 548 Zhou J, Sears RL, Xing X, Zhang B, Li D, Rockweiler NB, Jang HS, Choudhary MNK, Lee HJ,  
549 Lowdon RF, et al. 2017. Tissue-specific DNA methylation is conserved across human,  
550 mouse, and rat, and driven by primary sequence conservation. *BMC Genomics* **18**: 724.
- 551 Zhou X, Li D, Lowdon RF, Costello JF, Wang T. 2014. methylC Track: visual integration of  
552 single-base resolution DNA methylation data on the WashU EpiGenome Browser.  
553 *Bioinformatics* **30**: 2206–2207.
- 554 Zhou X, Maricque B, Xie M, Li D, Sundaram V, Martin EA, Koebbe BC, Nielsen C, Hirst M,  
555 Farnham P, et al. 2011. The Human Epigenome Browser at Washington University.  
556 *Nature Methods* **8**: 989–990.
- 557 Zhou Y, Liu S, Hu Y, Fang L, Gao Y, Xia H, Schroeder SG, Rosen BD, Connor EE, Li C, et al.  
558 2020. Comparative whole genome DNA methylation profiling across cattle tissues  
559 reveals global and tissue-specific methylation patterns. *BMC Biology* **18**: 85.
- 560 Zhuo X, Du AY, Pehrsson EC, Li D, Wang T. 2020. Epigenomic differences in the human and  
561 chimpanzee genomes are associated with structural variation. *Genome Res*  
562 gr.263491.120.
- 563
